# Supplementary material for: Miro proteins coordinate microtubule‐ and actin‐dependent mitochondrial transport and distribution
Source: PubMed Central journal article supplement (PMC5793800; doi:10.15252/embj.201696380), 2018-01-08

Figure 7; Panel A

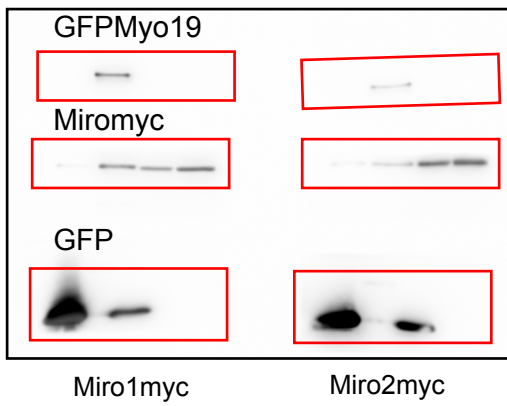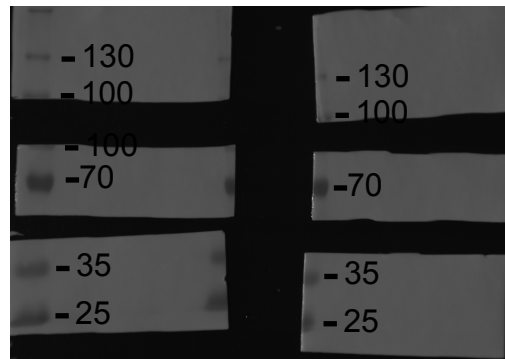

Figure 7; Panel B (anti-Myo19) - WT

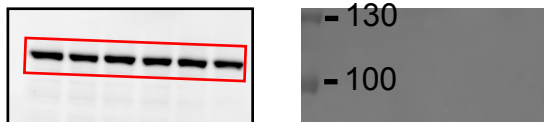

Figure 7; Panel B (anti-actin) - WT

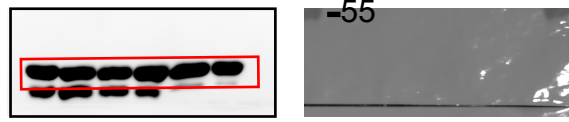

Figure 7; Panel B (anti-Myo19) - M1KO

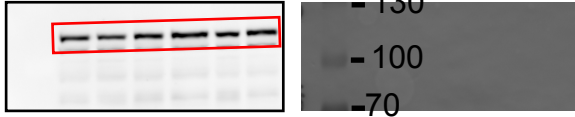

Figure 7; Panel B (anti-actin) - M1KO

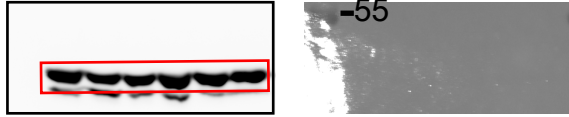

Figure 7; Panel B (anti-Myo19) - M2KO

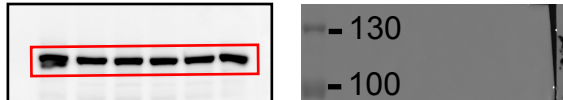

Figure 7; Panel B (anti-actin) - M2KO

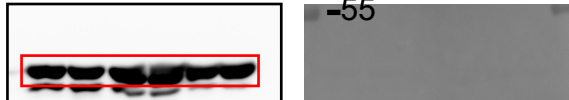

Figure 7; Panel B (anti-Myo19) - DKO

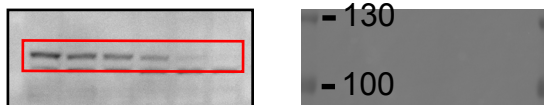

Figure 7; Panel B (anti-actin) - DKO

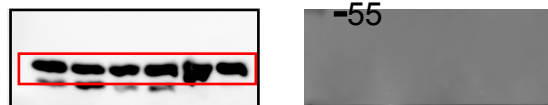

Figure 7; Panel D (anti-Myo19)

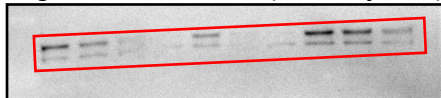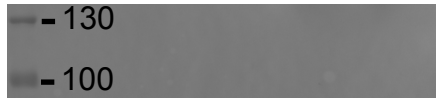

Figure 7; Panel D (anti-actin)

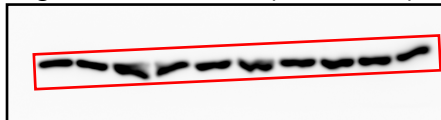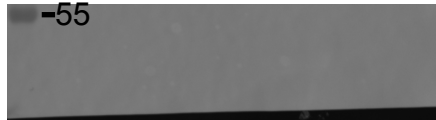

Figure 7; Panel F (anti-Miro1)

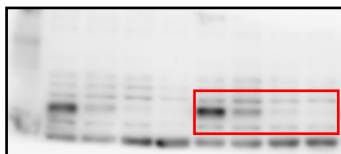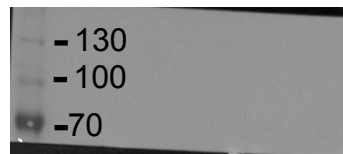

Figure 7; Panel F (anti-Myo19)

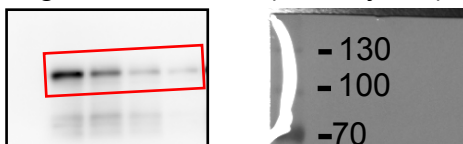

Figure 7; Panel F (anti-PDHE1a)

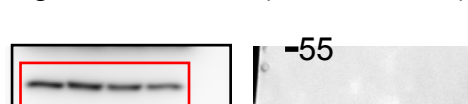

Supplement: EMBJ-37-321-s011.pdf [file EMBJ-37-321-s011.pdf]
