# Supplementary material for: Miro proteins coordinate microtubule‐ and actin‐dependent mitochondrial transport and distribution
Source: PubMed Central journal article supplement (PMC5793800; doi:10.15252/embj.201696380), 2018-01-08
Supplement: EMBJ-37-321-s003.pdf [file EMBJ-37-321-s003.pdf]

**Table EV1: Analysis of prenatal viability of embryos from double heterozygotes X double heterozygotes matings. Visual examination and posterior genotyping at the indicated developmental stages.**

| Stage of development | Number of pups/embryos<br>(number of litters) | Genotype |       |       |                |                |      |                |                  |                | Unknown <sup>(a)</sup> |
|----------------------|-----------------------------------------------|----------|-------|-------|----------------|----------------|------|----------------|------------------|----------------|------------------------|
|                      |                                               | WT       | M1het | M2het | M1het<br>M2het | M1KO           | M2KO | M1KO<br>M1het  | M1het<br>M2KO    | M1KO<br>M2KO   |                        |
| <b>P0</b>            | <b>27</b> (5)                                 | 4        | 3     | 2     | 13             | <b>1</b> (0/1) | n.f. | <b>4</b> (0/4) | n.f.             | n.f.           | 0                      |
| <b>E16</b>           | <b>55</b> (9)                                 | 3        | 3     | 11    | 18             | 3              | 6    | 2              | <b>7</b> (0/7)   | n.f.           | 2                      |
| <b>E14</b>           | <b>27</b> (4)                                 | 1        | 1     | 10    | 7              | n.f.           | 5    | n.f.           | <b>3</b> (0/3)   | n.f.           | 0                      |
| <b>E12</b>           | <b>79</b> (11)                                | 4        | 13    | 15    | 22             | 5              | 5    | 6              | <b>6</b> (3/3)   | n.f.           | 3                      |
| <b>E10</b>           | <b>77</b> (10)                                | 2        | 9     | 9     | 22             | 6              | 6    | 6              | <b>6</b> (6/0)   | <b>5</b> (0/5) | 6                      |
| <b>E8</b>            | <b>85</b> (11)                                | 8        | 12    | 9     | 17             | 6              | 5    | 10             | <b>10</b> (10/0) | <b>5</b> (5/0) | 3                      |

Colour coded numbers are (# of embryos viable / # of embryos not viable).

n.f. (not found): Genotype not found at the developmental stage studied.

<sup>(a)</sup> Unknown genotype due to advanced state of reabsorption.
