# Supplementary material for: Miro proteins coordinate microtubule‐ and actin‐dependent mitochondrial transport and distribution
Source: PubMed Central journal article supplement (PMC5793800; doi:10.15252/embj.201696380), 2018-01-08

Figure 1; Panel F (anti-Miro)

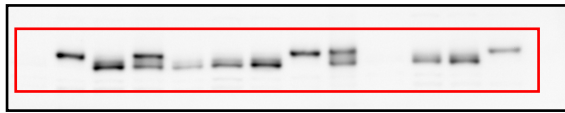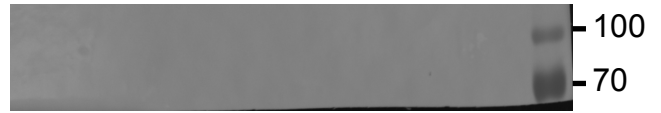

Figure 1; Panel F (anti-PDHE1a / GAPDH / CytC)

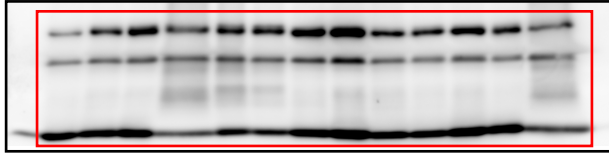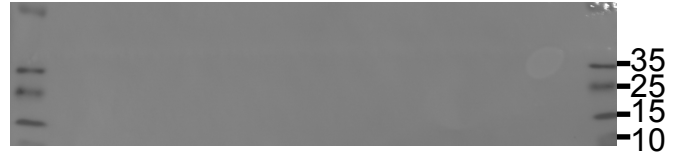

Figure 1; Panel G (anti-Miro)

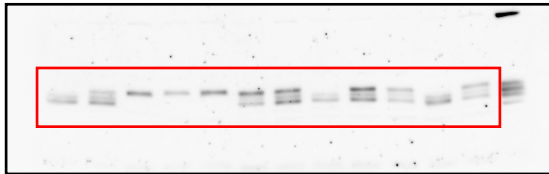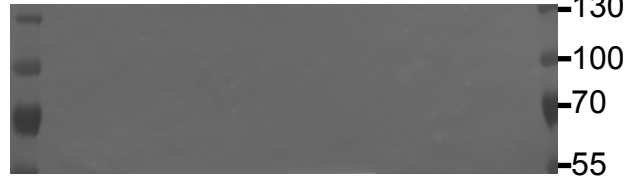

Figure 1; Panel G (anti-Actin)

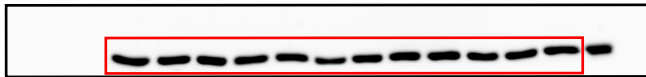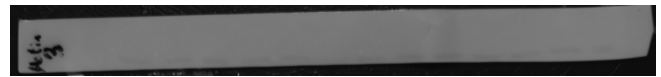

Supplement: EMBJ-37-321-s008.pdf [file EMBJ-37-321-s008.pdf]
