# Supplementary material for: Miro proteins coordinate microtubule‐ and actin‐dependent mitochondrial transport and distribution
Source: PubMed Central journal article supplement (PMC5793800; doi:10.15252/embj.201696380), 2018-01-08
Supplement: EMBJ-37-321-s010.pdf [file EMBJ-37-321-s010.pdf]

Figure 6; Panel A (anti-Myo19)

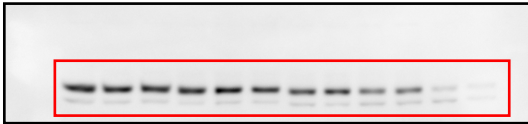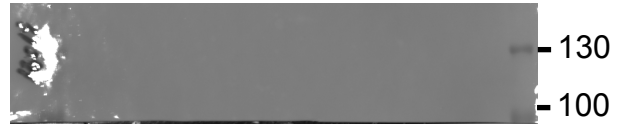

Figure 6; Panel A (anti-Actin)

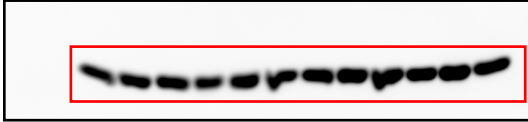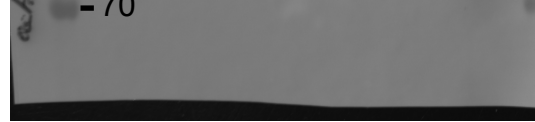

Figure 6; Panel C (anti-Myo19)

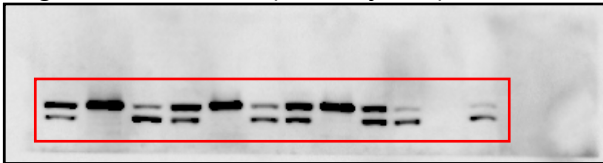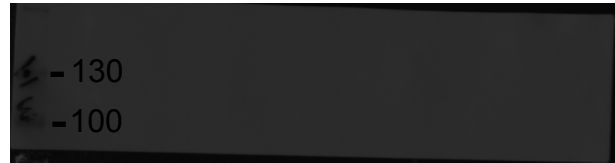

Figure 6; Panel C (anti-CVa/PDHE1a)

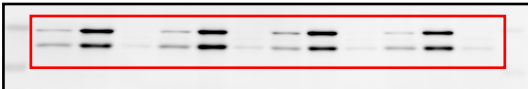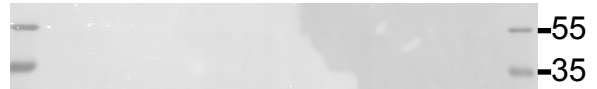

Figure 6; Panel C (anti-GAPDH)

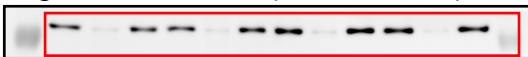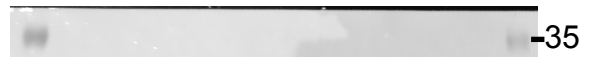

-35

-55

-35
